# Supplementary material
Source: bioRxiv or medRxiv preprint supplement (http://medrxiv.org/highwire/filestream/83248/field_highwire_adjunct_files/1/2020.05.27.20114363-2.pdf)

### **Additional file 1: Additional Material**

Brain samples were obtained from 11 patients using a new procedure. A protection device was placed around the head of the patient (see figure below). Two openings were made in the device to allow the neurosurgical procedure. Right and left parieto-frontal drill holes were made using a hand-drill (to avoid use of an oscillating saw). The following samples were obtained from the right and left locations: frontal lobe en bloc resections and anterior and posterior stereotactic biopsies. Samples from the brainstem were obtained with a stereotactic needle. For each location, frozen and formalin-fixed paraffin-embedded (FFPE) samples were collected.

**Additional Figure S1:** Protection device placed around the head of the patient

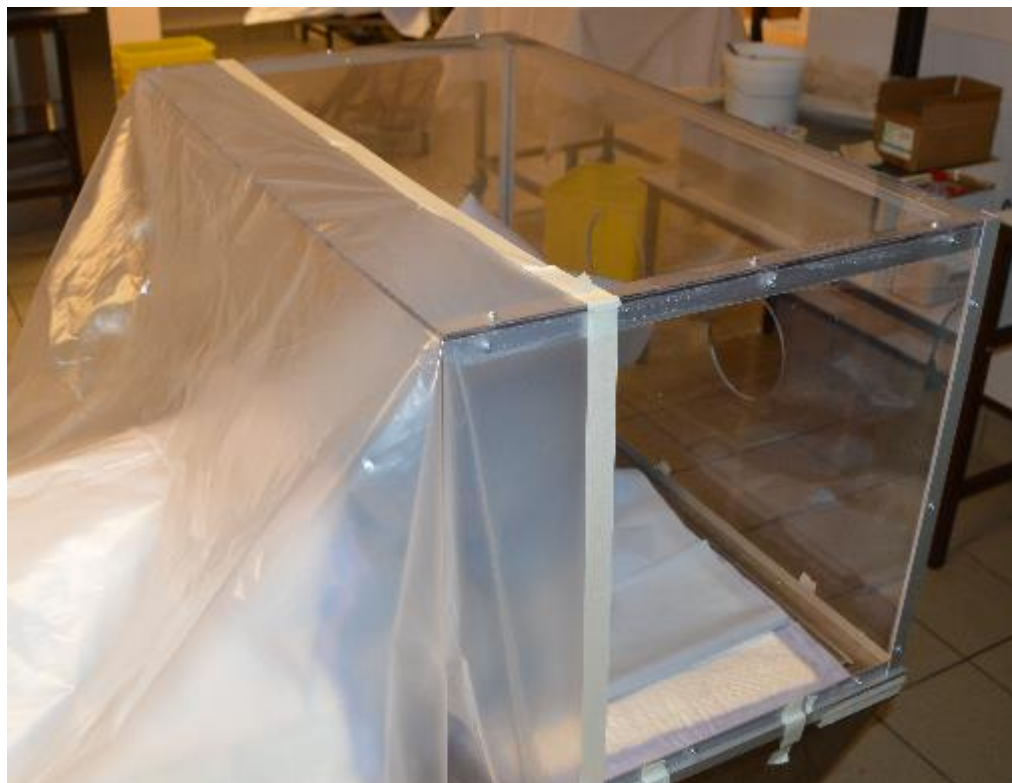

Supplement: Supplementary file [file 2020.05.27.20114363-2.pdf]
